# Supplementary figures and images for: Architecture of ribonucleoprotein complexes in influenza A virus particles
Source: Springer Nature journal article supplement (doi:10.1038/nature04378), 2006-01-01

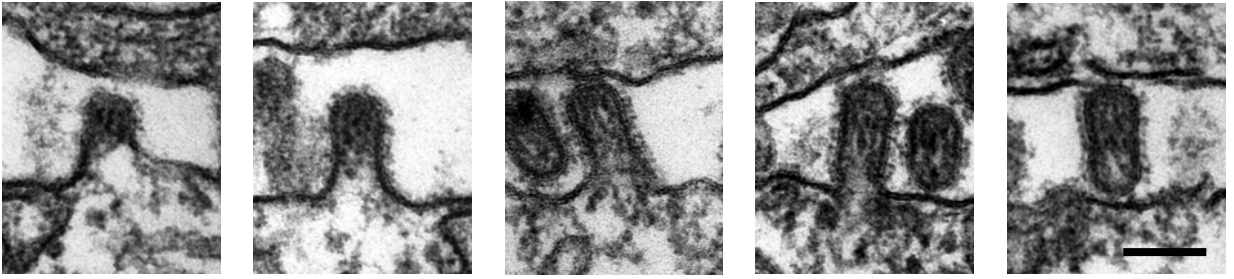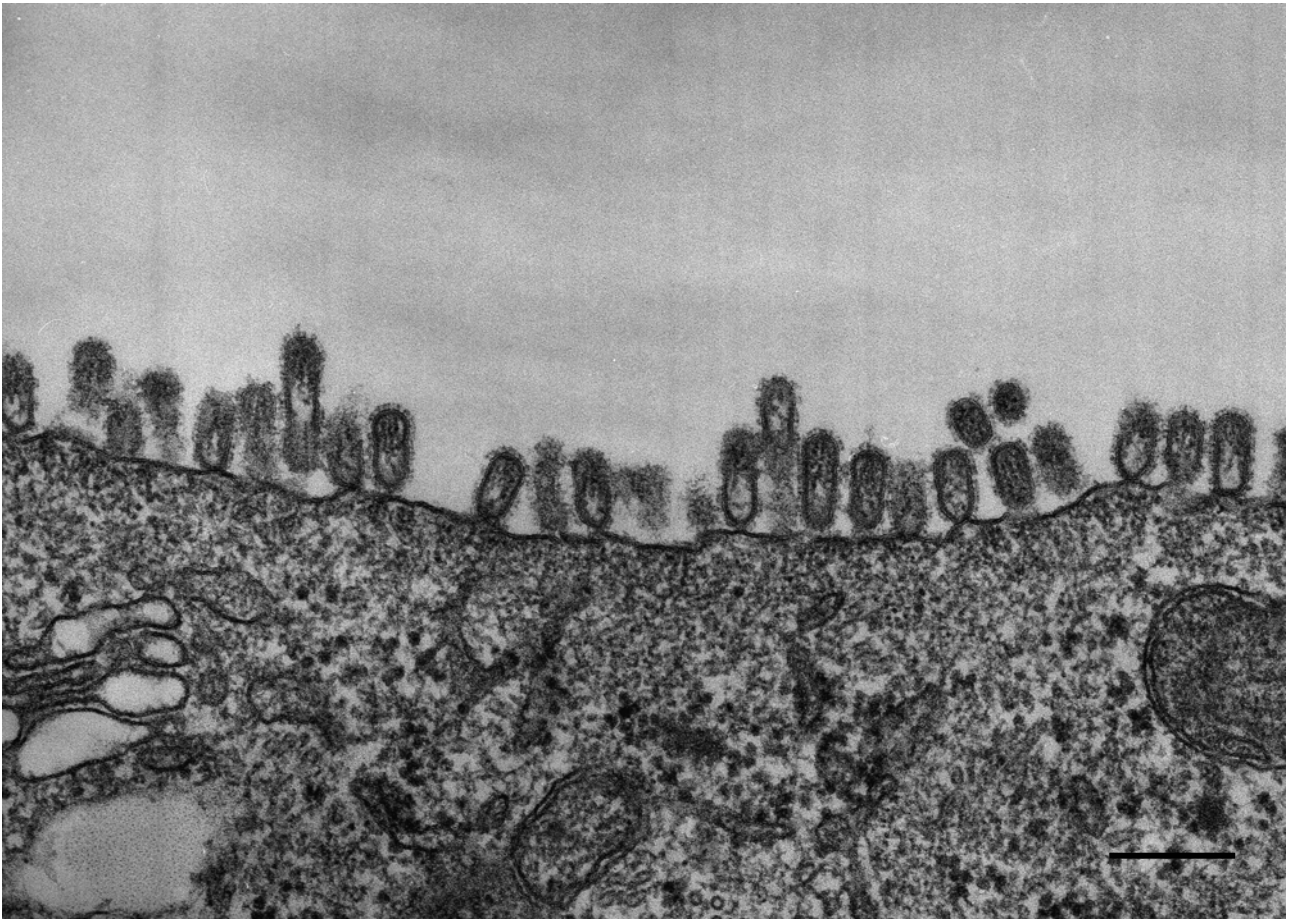

Supplementary figure 1

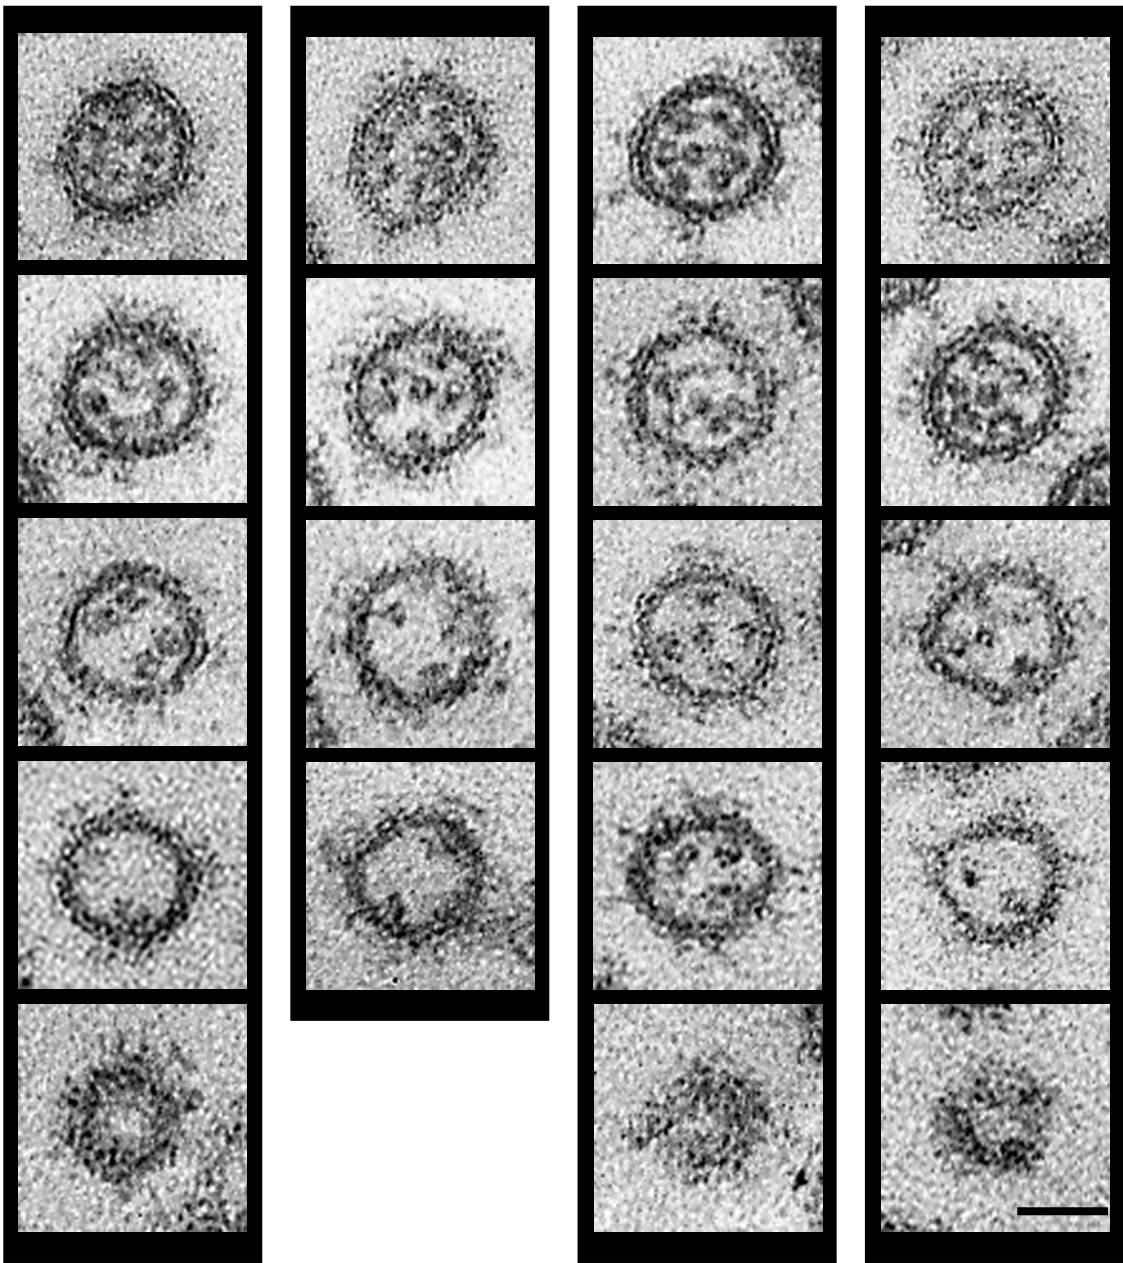

top

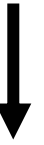

bottom

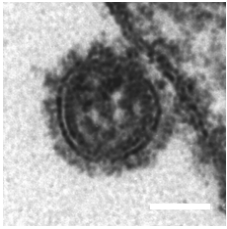

A/PR/8/34

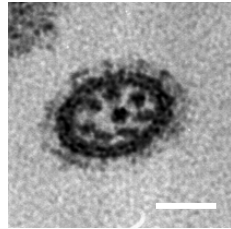

A/Aichi/2/  
68

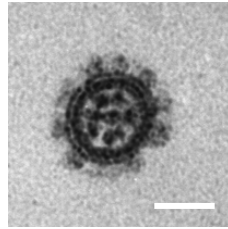

A/mallar  
d/NY/  
6750/78

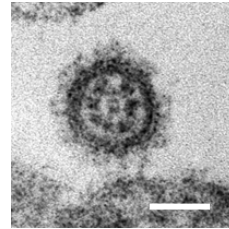

A/dk/HK/  
836/80

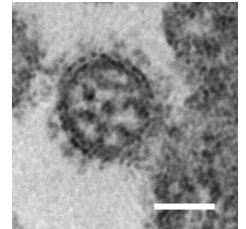

A/sw/Chib  
a/1/91

a

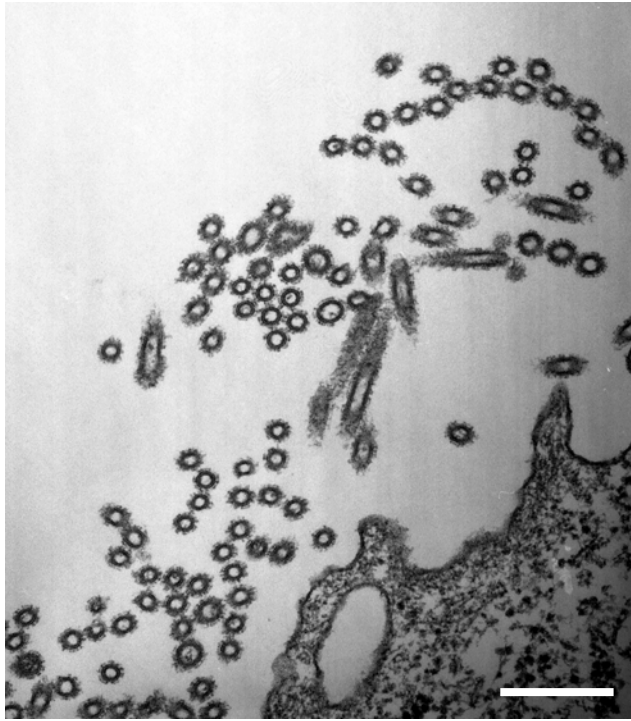

b

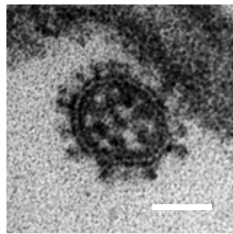

c

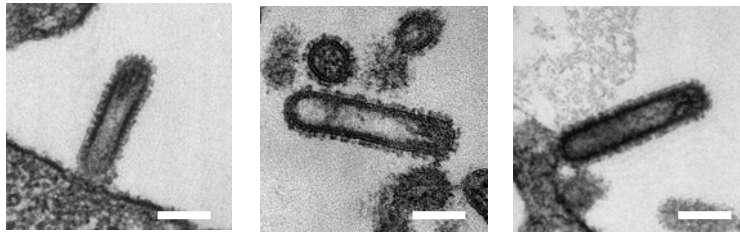

Supplement: 41586_2006_BFnature04378_MOESM1_ESM.pdf [file 41586_2006_BFnature04378_MOESM1_ESM.pdf]
